# Supplementary material
Source: PubMed Central journal article supplement (PMC2865566)
Supplement: NIHMS170589-supplement-2.pdf [file NIHMS170589-supplement-2.pdf]

|              | <b>EGF</b> | <b>TGF<math>\alpha</math></b> | <b>Epiregulin</b> | <b>HB-EGF</b> | <b>Amphiregulin</b> | <b>TNF<math>\alpha</math></b> | <b>TGF<math>\beta</math>1</b> | <b>PDGFB</b> | <b>PDGFA</b> | <b>PAI1-active</b> |
|--------------|------------|-------------------------------|-------------------|---------------|---------------------|-------------------------------|-------------------------------|--------------|--------------|--------------------|
|              | pg/ml      | pg/ml                         | pg/ml             | pg/ml         | pg/ml               | pg/ml                         | pg/ml                         | pg/ml        | pg/ml        | pg/ml              |
| <b>DU145</b> | 1.6        | 5.8                           | 30.2              | 18.8          | 143.6               | 2.6                           | 4935.0                        | 15.0         | 1160.0       | 43.4               |
| <b>22Rv1</b> | 1.2        | 18.6                          | 20.2              | 5.8           | 47.6                | 3.8                           | 3309.5                        | 22.5         | 424.6        | 24.0               |
| <b>LNCaP</b> | 1.0        | 0.6                           | 7.2               | <3.7          | 1.6                 | 3.2                           | 61.5                          | 12.4         | 129.0        | 30.8               |
| <b>PC3</b>   | 1.0        | 1.8                           | 17.4              | 2.4           | 7.6                 | 2.8                           | 1022.5                        | 17.7         | 10.2         | 16.2               |
|              |            |                               | <b>X</b>          | <b>X</b>      | <b>X</b>            |                               | <b>X</b>                      |              | <b>X</b>     |                    |

**Supplement Table T1: Cytokine secretion in human prostate cancer cells.** Cells were plated at a controlled density and cultured in serum-free medium for 72 hrs to allow for growth factor accumulation. The conditioned medium was collected, frozen, and analyzed by multiplex protein array at various dilutions. The protein concentrations (pg/ml of medium) were adjusted for dilution. EGF, TGF $\alpha$ , epiregulin, HB-EGF and amphiregulin are ligands of EGF-R. TGF $\beta$ 1 and PDGFA are known targets of Egr-1.

**x** : indicates that this result is shown in graphic form in Figure 4C.
